# Supplementary material
Source: Research Square preprint supplement (doi:10.21203/rs.3.rs-9446836/v1)
Supplement: Supplementary file 1 [file b738801841efd9e2fe700679.docx]

**Supporting information for**

**Enhanced Chiroptical Responses of Chiral Nanocubes Coupled to Periodic Nanopore Arrays**

Shuo Zhang1, Yingying Qian1, LanLan Shen1 and Yurui Fang1,*

1 *School of Physics, Dalian University of Technology, Dalian* 116024*, Liaoning, China*

* *Corresponding authors:* [*yrfang@dlut.edu.cn*](mailto:yrfang@dlut.edu.cn) *(Y.F.)*

**Section 1. Preparation of Au Nanopore Array**

The Au nanopore array was fabricated through a nanoimprint lithography (NIL) process using a PDMS soft template replicated from a silicon (Si) master mold.

The Si master mold with a hexagonal nanohole array (period ≈ 450 nm, diameter≈ 220 nm, depth ≈ 60 nm) was first prepared by deep ultraviolet (DUV) lithography combined with inductively coupled plasma (ICP) etching. Briefly, a single-crystal Si wafer was sequentially cleaned with acetone, isopropanol, and Piranha solution, followed by rinsing with ultrapure water and nitrogen drying. A PMMA photoresist layer was spin-coated and prebaked at 100 °C for 60 s. The nanohole pattern was defined by DUV exposure and subsequently developed to remove the exposed regions. The pattern was then transferred into the Si substrate via ICP etching, followed by complete removal of residual resist to obtain the Si master mold.

An anti-adhesion layer was spin-coated onto the Si mold and allowed to stabilize for more than 8 h. PDMS was then cast onto the treated mold and peeled off after curing to obtain an inverse nanodisk array soft template.

For nanoimprinting, a UV-curable resist was coated onto a Si substrate. The PDMS template was brought into conformal contact under vacuum conditions (20 kPa, room temperature), followed by UV curing (80 mW cm-2, 60 s). After curing, the PDMS template was gently detached, resulting in a replicated nanohole array in the resist layer.

Finally, 100 nm Au film was deposited by electron-beam evaporation to form the Au nanopore array. The fabricated samples were diced and cleaned prior to use.

**Section 2. Synthesis of Chiral Au Nanocubes**

Chiral Au nanocubes were synthesized via a seed-mediated growth approach combined with amino-acid-directed surface modulation. The procedure consists of three steps: seed preparation, growth of intermediate Au nanocubes, and chirality induction using cysteine molecules.

**Preparation of Au seeds:**

Au seed nanoparticles were first prepared using a rapid reduction method in a cetyltrimethylammonium bromide (CTAB) solution. Specifically, 0.25 mL of HAuCl₄ solution (10 mM) was added to 7.5 mL of CTAB aqueous solution (30 mM) under gentle stirring. Subsequently, 0.8 mL of freshly prepared NaBH₄ solution (20 mM) was rapidly injected into the mixture. The solution immediately turned brown, indicating the formation of small Au seed particles. The seed solution was then aged at 30 °C for 3 h before use to ensure stabilization.

**Preparation of Au Nanocubes:**

Au nanocubes were grown from the as-prepared seeds in a CTAB-mediated growth solution. In a typical procedure, 1.6 mL of CTAB solution (100 mM) and 0.2 mL of HAuCl₄ solution (10 mM) were added to 8 mL of deionized water. Subsequently, 0.95 mL of ascorbic acid solution (AA, 100 mM) was introduced as a mild reducing agent. A small amount (5 μL) of diluted seed solution was then added to initiate the growth process. The reaction mixture was gently mixed and allowed to stand at ~26–30 °C for 15 min.1

After the reaction, the products were collected by centrifugation and washed twice to remove excess surfactant and unreacted species. The purified nanoparticles were re-dispersed in a dilute CTAB solution (1 mM) for further use.

**Amino acid-induced chiral growth:**

The chiral features of the Au nanocubes were introduced through surface modification during a secondary growth process using cysteine as a chiral ligand. A growth solution was prepared by mixing CTAB (100 mM), HAuCl₄ (10 mM), and deionized water to form a [AuBr₄]- complex. AA (100 mM) was then added to reduce Au3+ to Au+, generating a mild growth environment. Subsequently, cysteine solution (0.1 mM) was introduced into the growth solution, followed by the addition of pre-formed Au nanocubes. The reaction was carried out at 30 °C for 1 h. During this process, cysteine molecules selectively adsorb onto specific crystallographic facets of the Au nanocubes, inducing asymmetric surface growth and resulting in chiral morphology.2

After the reaction, the products were collected by centrifugation and washed twice. The final chiral Au nanocubes were re-dispersed in either dilute CTAB solution or deionized water for subsequent optical measurements.

**Section 3. Incorporation of Chiral Au Nanocubes into Periodic Nanopore Arrays**

Chiral Au nanocubes were first dispersed in an aqueous solution to form a stable colloidal suspension. The as-fabricated Au nanopore array substrate was then fully immersed in the suspension and kept undisturbed for approximately 30 min to allow nanoparticle adsorption and localization within the nanopores.

After immersion, the substrate was carefully removed from the suspension and gently rinsed with deionized (DI) water to eliminate loosely attached nanoparticles and residual impurities. The sample was subsequently dried under ambient conditions in a clean environment, allowing slow solvent evaporation to minimize particle redistribution or aggregation induced by rapid drying.

This immersion-based assembly approach enables efficient incorporation of chiral Au nanocubes into the nanopore cavities, facilitating subsequent plasmonic coupling and optical measurements.

**Section 4.** **Numerical Simulation Details**

The electromagnetic response of the plasmonic nanopore array coupled with chiral Au nanocubes was investigated using the finite element method (FEM) implemented in COMSOL Multiphysics.

A three-dimensional unit cell model was constructed with geometric parameters consistent with the experimental structure (period P = 450 nm, nanopore diameter D = 220 nm, and pore depth h = 60 nm). Floquet periodic boundary conditions were applied along the in-plane directions to model the infinite periodic array.

The excitation was introduced via port boundary conditions along the surface-normal (z) direction. The incident wave was defined with a total input power of 1 W. To ensure consistent comparison between different polarization states and spectral responses, the incident electric field amplitude was normalized according to the input power using:

where I is the incident intensity corresponding to the input power, is the speed of light in vacuum, and is the vacuum permittivity. This normalization ensures that all simulated field intensities and derived quantities (e.g., scattering and chirality) are referenced to the same incident energy flux.

The polarization state of the incident light was controlled by a parameter , corresponding to left circular polarization (LCP) and right circular polarization (RCP), respectively. Parametric sweeps over this parameter were performed to extract polarization-dependent optical responses.

To quantify the chiral electromagnetic response, the optical chirality density C was calculated from the simulated fields, which is proportional to:

In addition, to enable direct comparison between different excitation conditions, the calculated optical chirality was further normalized by the incident field intensity, ensuring that the observed variations arise solely from structural effects rather than differences in excitation amplitude.

All simulations were performed in the frequency domain. A non-uniform mesh with local refinement near the nanopore and nanoparticle regions was employed to ensure numerical accuracy. The resulting field distributions and derived quantities were obtained through post-processing within COMSOL.

**Section 5. Born–Kuhn Model Analysis of Coupling-Induced g-Factor Reversal**

The coupled dipole approximation (CDA), where each particle is represented by a point dipole with an effective polarizability obtained by solving the coupled dipole equation. The corresponding uncoupled dipole polarizabilities are obtained by approximating each disk by an oblate spheroid with similar dimensions to those particles3.


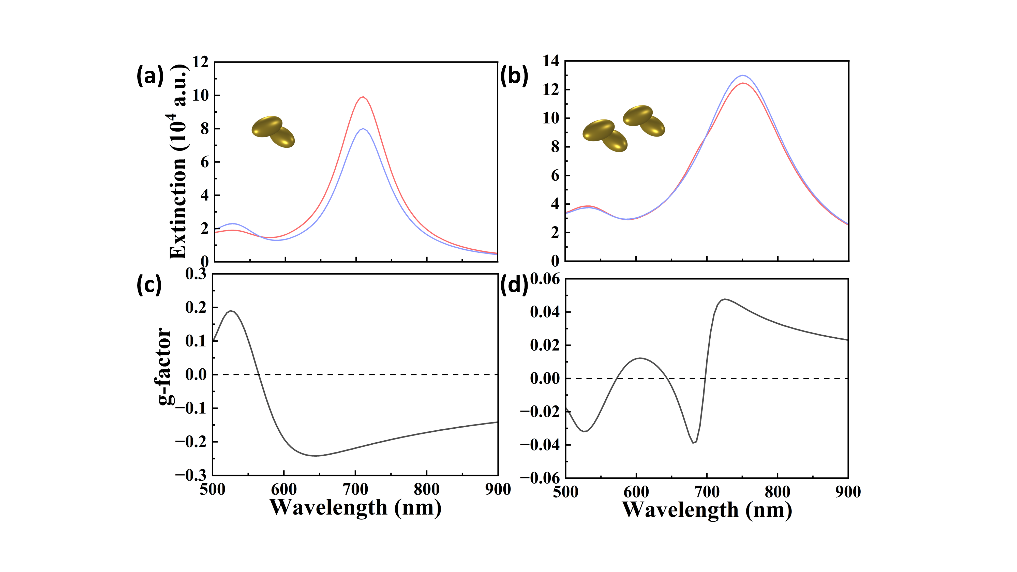


**Figure S1. Coupled dipole approximation simulated Born-Kuhn model of coupling-induced chiroptical response.** Simulated spectra for (a, c) a single chiral oscillator and (b, d) a coupled dimer system. (a, b) LCP (blue) and RCP (red) scattering spectra, and (c, d) the corresponding g-factor spectra. While the single oscillator exhibits a negative g-factor response (c), the coupled dimer displays a pronounced polarity reversal with a positive peak (d). The agreement with the experimental trend confirms that the observed g-factor inversion can be understood as a general consequence of inter-particle coupling.

**Section 6. Near-Field Electromagnetic and Chiral Field Distributions at 850 nm**


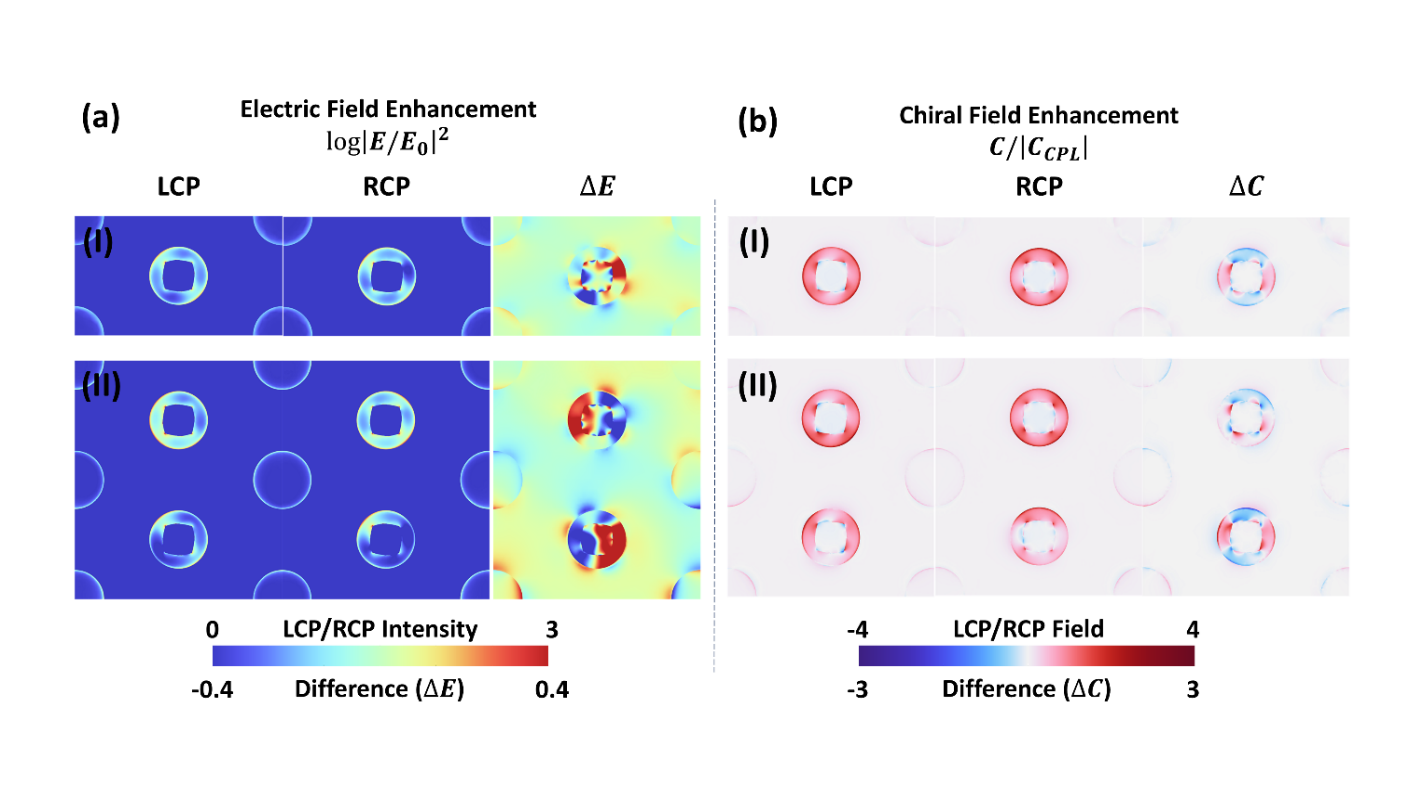


**Figure S2.** **Near-field electromagnetic and chiral field distributions of the nanopore–nanocube coupled systems at 850 nm.** Simulated (a) electric field enhancement () and (b) optical chiral field () under left- and right-circularly polarized (LCP/RCP) excitations for (I) a single nanocube embedded within a nanopore cavity and (II) an inter-cavity nanocube dimer embedded within adjacent nanopore cavities. The corresponding difference maps ( and ) highlight the near-field asymmetry. At this off-resonant wavelength, the chiral field distribution remains relatively weak and spatially localized compared to the resonance conditions shown in the main text, while the dimer configuration exhibits a modified spatial symmetry due to inter-cavity coupling, consistent with the role of lattice-mediated interactions in governing the far-field response in governing the far-field chiroptical response.

**References:**

1. Xia, Y.; Xiong, Y.; Lim, B.; Skrabalak, S. E., Shape-Controlled Synthesis of Metal Nanocrystals: Simple Chemistry Meets Complex Physics? *Angew Chem Int Ed Engl* **2009**, *48*, 60-103.

2. Lee, H. E.; Ahn, H. Y.; Mun, J.; Lee, Y. Y.; Kim, M.; Cho, N. H.; Chang, K.; Kim, W. S.; Rho, J.; Nam, K. T., Amino-Acid- and Peptide-Directed Synthesis of Chiral Plasmonic Gold Nanoparticles. *Nature* **2018**, *556*, 360-+.

3. Hu, L.; Huang, Y. Z.; Pan, L. J.; Fang, Y. R., Analyzing Intrinsic Plasmonic Chirality by Tracking the Interplay of Electric and Magnetic Dipole Modes. *Sci Rep-Uk* **2017**, *7*, 11151.
